# Supplementary material for: Suppression of MyD88 disturbs gut microbiota and activates the NLR pathway and hence fails to ameliorate DSS-induced colitis
Source: PubMed Central journal article supplement (PMC11212664; doi:10.1093/pcmedi/pbae013), 2024-06-06
Supplement: pbae013_supplemental_file.pdf [file pbae013_supplemental_file.pdf]

**Supplementary Table 1. Scoring criteria for disease activity index (DAI)\***

| <b>Score</b> | <b>Weight loss (%)</b> | <b>Stool consistency</b> | <b>Occult/gross bleeding</b> |
|--------------|------------------------|--------------------------|------------------------------|
| 0            | (-)                    | Normal                   | Normal                       |
| 1            | 1-5                    | Loose                    |                              |
| 2            | 6-10                   | Loose                    | Guica(+)                     |
| 3            | 11-15                  | Diarrhea                 |                              |
| 4            | >15                    | Diarrhea                 | Gross bleeding               |

\*DAI=score (weight loss + stool consistency + bleeding) /3

\*Normal stools well formed pellets; loose pasty stools which do not stick to the anus; diarrhea liquid stools that stick to the anus.

**Supplementary Table 2. Histological grading of colitis**

| <b>Feature graded</b>          | <b>Grade</b> | <b>Description</b>                                                             |
|--------------------------------|--------------|--------------------------------------------------------------------------------|
| Inflammatory cell infiltration | 0            | Occasional inflammatory cells in the lamina propria                            |
|                                | 1            | Increased infiltrate in the lamina propria predominantly at the base of crypts |
|                                | 2            | Confluence of inflammatory infiltrate extending into the mucosa                |
|                                | 3            | Transmural extension of infiltrate                                             |
| Inflammation extent            | 0            | None                                                                           |
|                                | 1            | Mucosa                                                                         |
|                                | 2            | Mucosa and submucosa                                                           |
|                                | 3            | Transmural                                                                     |
| Crypt damage                   | 0            | None                                                                           |
|                                | 1            | Basal 1/3 damaged                                                              |
|                                | 2            | Basal 2/3 damaged                                                              |
|                                | 3            | Only surface epithelium intact                                                 |
|                                | 4            | Entire crypt and epithelium lost                                               |
| Percent involvement            | 1            | 1-25%                                                                          |
|                                | 2            | 26-50%                                                                         |
|                                | 3            | 51-75%                                                                         |
|                                | 4            | 76-100%                                                                        |

**Supplementary Table 3. Primers used for RT-PCR**

| <b>Primer</b> | <b>Sequence</b>                                                                   |
|---------------|-----------------------------------------------------------------------------------|
| IL-1 $\beta$  | Forward: 5'-ACTCCTTAGTCCTCGGCCA-3'<br>Reverse: 5'-TGGTTTCTTGTGACCCTGAGC-3'        |
| TNF- $\alpha$ | Forward: 5'-CAGGCGGTGCCTATGTCTC-3'<br>Reverse: 5'-CGATCACCCCGAAGTTCAGTAG-3'       |
| IFN- $\gamma$ | Forward: 5'-GCCACGGCACAGTCATTGA-3'<br>Reverse: 5'-TGCTGATGGCCTGATTGTCTT-3'        |
| MyD88         | Forward: 5'-TCATGTTCTCCATACCCTTGGT-3'<br>Reverse: 5'-AAACTGCGAGTGGGGTCAG-3'       |
| ZO-1          | Forward: 5'-GCCGCTAAGAGCACAGCAA-3'<br>Reverse: 5'-GCCCTCCTTTTAACACATCAGA-3'       |
| Claudin-5     | Forward: 5'-GCAAGGTGTATGAATCTGTGCT-3'<br>Reverse: 5'-GTCAAGGTAACAAAGAGTGCCA-3'    |
| Occludin      | Forward: 5'-TGAAAGTCCACCTCCTTACAGA-3'<br>Reverse: 5'-CCGGATAAAAAGAGTACGCTGG-3'    |
| TGF- $\beta$  | Forward: 5'-CCACCTGCAAGACCATCGAC-3'<br>Reverse: 5'-CTGGCGAGCCTTAGTTTGGAC-3'       |
| EGF           | Forward: 5'-TTAACGGGACAGGACTAGAGAAA-3'<br>Reverse: 5'-AAGGAACTTAGAAGAAGTCCGGGA-3' |
| COX-2         | Forward: 5'-CCACCTCTGCGATGCTCTTC-3'<br>Reverse: 5'-ACATTCCCCACGGTTTTGAC-3'        |
| IL-17         | Forward: 5'-TTTAACTCCCTTGGCGCAAAA-3'<br>Reverse: 5'-CTTTCCCTCCGCATTGACAC-3'       |
| IRF7          | Forward: 5'-GCGTACCCTGGAAGCATTTC-3'<br>Reverse: 5'-GCACAGCGGAAGTTGGTCT-3'         |
| CCL2          | Forward: 5'-TAAAAACCTGGATCGGAACCAAA-3'<br>Reverse: 5'-GCATTAGCTTCAGATTTACGGGT-3'  |
| IFI16         | Forward: 5'-AAAGGAGCCTGCTAAGGAAGA-3'<br>Reverse: 5'-CGTTCACATCAGAGACACAGGA-3'     |
| GAPDH         | Forward: 5'-AGGTCGGTGTGAACGGATTTG-3'<br>Reverse: 5'-GGGGTCGTTGATGGCAACA-3'        |

**Supplementary Table 4. Primers for the V3-V4 region of the 16S rRNA gene**

| <b>Primier</b> | <b>Sequence</b>                     |
|----------------|-------------------------------------|
| 338F           | Forward: 5'-ACTCCTACGGGAGGCAGCAG-3' |
| 806R           | Reverse: 5'-GGACTACHVGGGTWTCTAAT-3' |

## Supplementary Figure 1

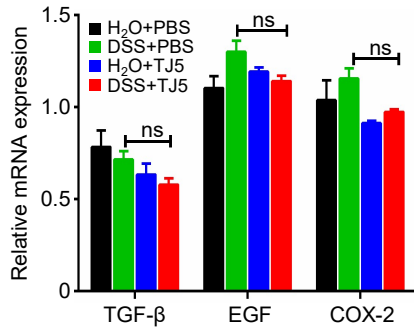

**Supplementary Figure 1. MyD88 inhibition failed to interfere with the intestinal epithelial reconstruction ability.** Relative mRNA expression levels of TGF-β1, EGF, and COX-2 in colon tissue of control and TJ5-treated mice by RT-PCR analysis. Data were represented as mean ± SEM, \* $p < 0.05$ , ns: not significant. TJ5: TJ-M2010-5.

## Supplementary Figure 2

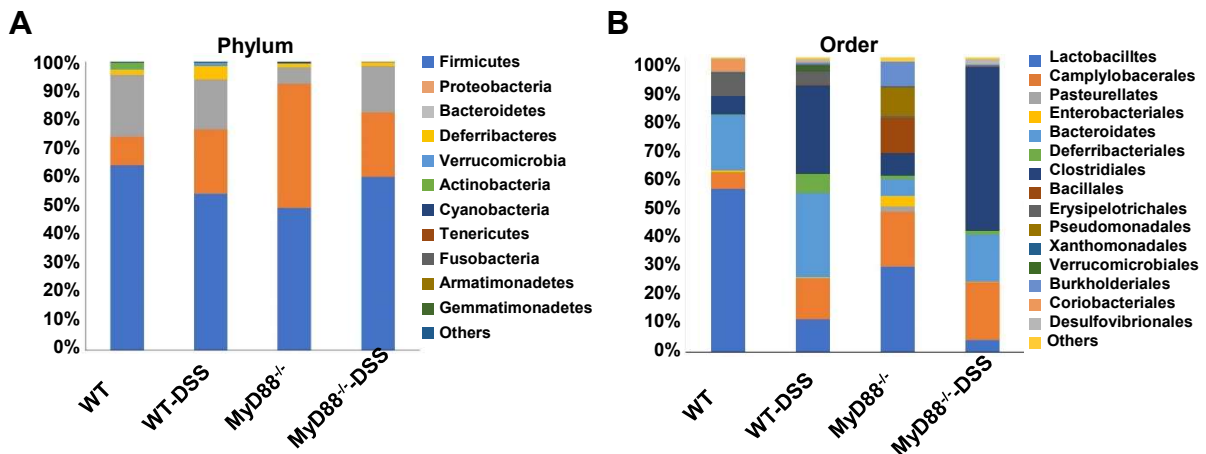

**Supplementary Figure 2. Effects of MyD88 deficiency on the intestinal microflora in mice.** Average relative abundances of taxa at the phylum level (A) and order level (B) among four groups.

## Supplementary Figure 3

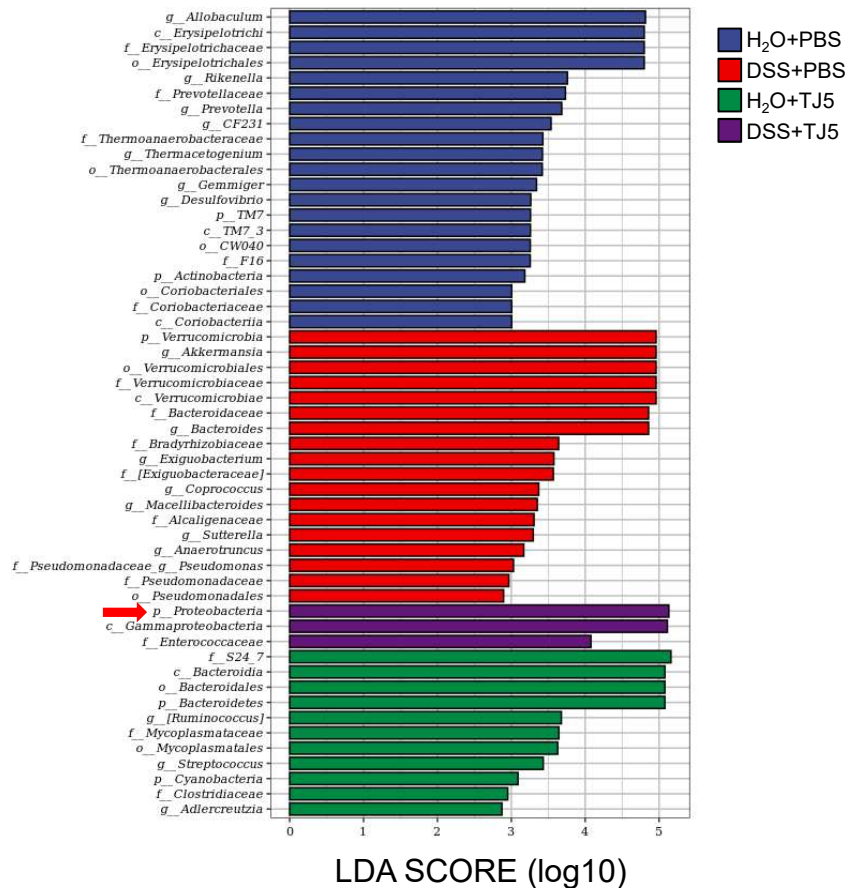

**Supplementary Figure 3.** Significant changes in functional profiles were suggested based on phylogenetic investigations of communities through LefSe analyses (LDA-score >2.5). The dominating taxa in DSS+TJ5 group were enriched in *Proteobacteria* at the phylum level.

# Supplementary Figure 4

## Enriched GO Terms (DSS+TJ5 vs DSS+PBS)

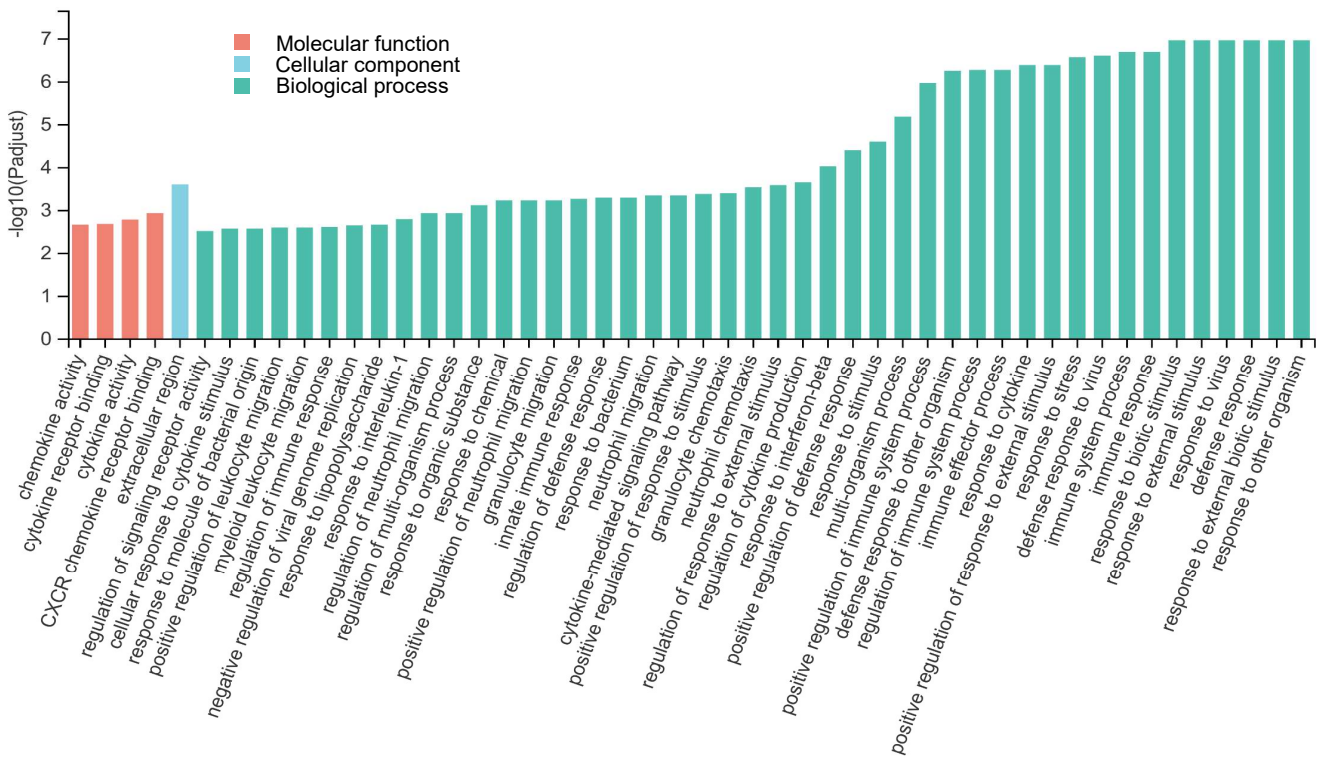

**Supplementary Figure 4.** The differentially expressed genes of DSS+TJ5 group compare with DSS+PBS group were analyzed by GO.

## Supplementary Figure 5

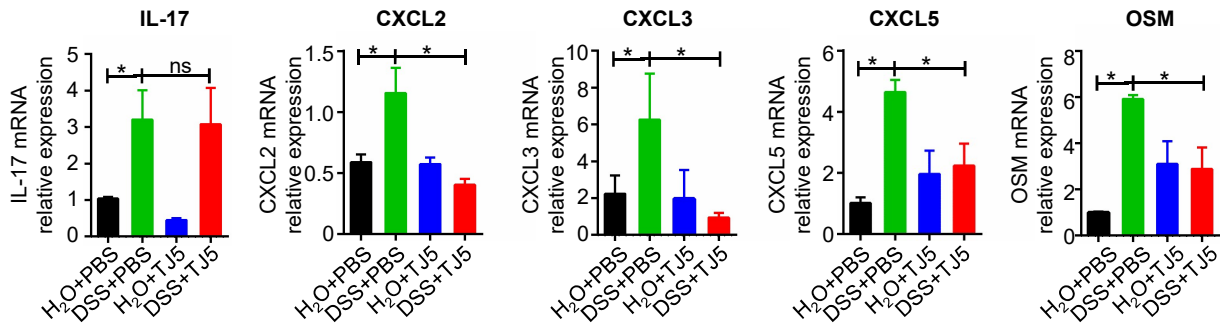

**Supplementary Figure 5.** The differentially expressed genes (DSS+PBS group vs. DSS+TJ5 group) associated with NOD-like receptor signaling pathway were identified by RT-PCR. Data were represented as mean  $\pm$  SEM, \* $p$ <0.05, ns: not significant. TJ5: TJ-M2010-5.

## Supplementary Figure 6

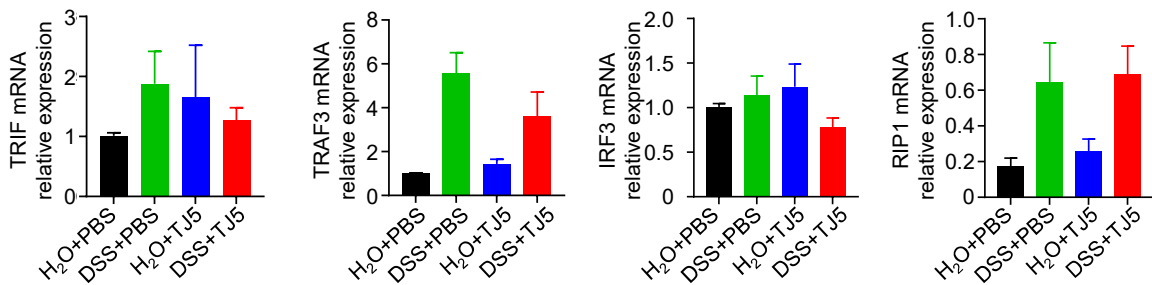

**Supplementary Figure 6.** No significant difference was detected in the key genes involved in the MyD88-independent signaling pathway by RT-PCR. TJ5: TJ-M2010-5.

## Supplementary Figure 7

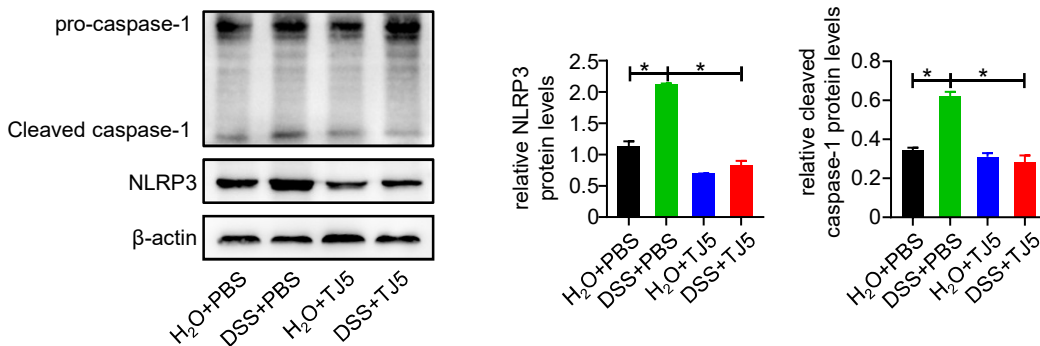

**Supplementary Figure 7.** NLRP3 signaling activation was suppressed by TJ5 administration determined by western blot analysis. Data were represented as mean  $\pm$  SEM, \* $p$ <0.05, ns: not significant. TJ5: TJ-M2010-5.
